# Supplementary material for: Not just a Barbie in hijab: participant perspectives on culturally tailoring a virtual health assistant for Bangladeshi immigrants in the US promoting colorectal cancer screening
Source: PubMed Central journal article supplement — Mhealth. 2024 Oct 23;10:30. doi: 10.21037/mhealth-24-31 (PMC11557162; doi:10.21037/mhealth-24-31), 2024-10-23
Supplement: mh-10-24-31-supplementary.pdf [file mh-10-24-31-supplementary.pdf]

## Appendix 1

Semi structured interview guide:

I'd like to talk to you about a technology we at the University of Florida, are trying to develop that can help people learn more about colorectal cancer, its symptoms, risk factors, and preventions. We are developing a computer avatar who looks like a doctor and talks about all these things. The good thing about this computer avatar, which we call a Virtual Health Assistant (VHA), is that a patient can access it through their computer or mobile phone, without having to go to a hospital to see learn about these things. This saves time, transportation cost, and what not. Here are six sample pictures of the Virtual Health Assistants. Which one would you like to interact with?

Now I am going to show you a clip of the VHA. The VHA may not reflect the choice you made earlier.

35. What did you think about the VHA?

- What did you like?
- What did you not like?

36. Do you agree with what the VHA told you about colorectal cancer? Why/ why not?

37. Will you be willing to use it instead of going to a doctor? Why/why not?

38. What can make it better for your use?

39. what language would you prefer the VHA to speak in?

40. What were the useful parts of the information given?

41. What's your understanding of the information?

42. Is there anything you wish I had asked in this interview that I did not?

Qualtrics Questionnaire:

1. How old were you on your last birthday in years? (Please answer in numbers)

2. What is your sex?

Male (1)

Female (2)

3. How do you describe your race? (Check all that apply.)

American Indian or Alaska Native: A person having origins in any of the original peoples of North, Central, or South America, and who maintains tribal affiliations or community attachment. (1)

Asian: A person having origins in any of the original peoples of the Far East, Southeast Asia, or the Indian subcontinent including, for example, Bangladesh, China, India, Japan, Korea, Malaysia, Pakistan, the Philippine Islands, Thailand, and Vietnam. (2)

Black or African American: A person having origins in any of the black racial groups of Africa. (3)

Native Hawaiian or Other Pacific Islander: A person having origins in any of the original peoples of Hawaii, Guam, Samoa, or other Pacific Islands. (4)

White: A person having origins in any of the original peoples of Europe, the Middle East, or North Africa. (5)

4. What language is primarily spoken in your home?

English (1)

Bangla (2)

Other (Please Specify) (3) \_\_\_\_\_

5. What is your marital status?

Married (1)

Divorced (2)

Separated (3)

Single (4)

Widowed (5)

6. What is the last grade or class you completed in school?

Less than grade 1 (1)

Grades 1-8 (2)

High school incomplete (grades 9-11) (3)

High school graduate (grade 12 or GED certificate) (4)

Technical, trade or vocational school AFTER high school (5)

Some college, no 4-year degree (includes associate degree) (6)

College graduate (B.Sc., B.A., or other 4-year degree) (7)

Post-graduate training/professional school after college (M.A., Ph.D., JD or MD) (8)

7. Do you have health insurance?

Definitely yes (1)

Probably yes (2)

Probably not (3)

Definitely not (4)

8. (If definitely yes) What kind of insurance do you have? (Mark all that apply)

Health insurance through your or someone else's job (1)

Health insurance bought directly by you or your family (2)

Medicare (3)

Medicaid (4)

Other, please specify: (5) \_\_\_\_\_

None (6)

I don't know (7)

9. Which of the following income ranges best describes your total household income in 2019-2020 before taxes from all sources?

Less than \$15,000 (1)

\$15,000 to under \$20,000 (2)

\$20,000 to under \$30,000 (3)

\$30,000 to under \$40,000 (4)

- \$40,000 to under \$50,000 (5)
- \$50,000 to under \$75,000 (6)
- \$75,000 to under \$100,000 (7)
- \$100,000 to under \$150,000 (8)
- \$150,000 or more (9)
- I'd prefer not to answer. (10)

10. How many people are in your household?

- 1 (1)
- 2 (2)
- 3 (3)
- 4 (4)
- 5 (5)
- 6 (6)
- 7 (7)
- 8 (8)
- More than 8 (9)

11. What is your religious preference?

- Christian (1)
- Jewish (2)
- Muslim (includes Islam/Islamic) (3)
- Buddhist (4)
- Hindu (5)
- Other, please specify \_\_\_\_\_ (6)
- No religion (7)
- I would prefer not to answer (8)

12. Which of the following VHAs would you prefer to interact with?

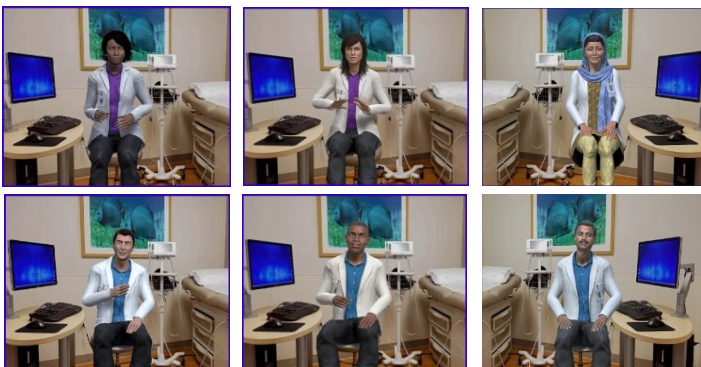

13. How much do you like/dislike the following VHAs?

|                                                                                     | Dislike (1) | Somewhat Dislike (2) | Neutral (3) | Somewhat Like (4) | Like (5) |
|-------------------------------------------------------------------------------------|-------------|----------------------|-------------|-------------------|----------|
|    |             |                      |             |                   |          |
|    |             |                      |             |                   |          |
|    |             |                      |             |                   |          |
|    |             |                      |             |                   |          |
|   |             |                      |             |                   |          |
|  |             |                      |             |                   |          |

Links

VHA link

[http://www.virtualpeoplefactory.com/Classic/Interaction/Prototype\\_CRC\\_PilotB/99?username=p111010](http://www.virtualpeoplefactory.com/Classic/Interaction/Prototype_CRC_PilotB/99?username=p111010)

Qualtrics link

[https://ufl.qualtrics.com/jfe/form/SV\\_0GjixokcHoyNjX7](https://ufl.qualtrics.com/jfe/form/SV_0GjixokcHoyNjX7)
